# Supplementary material for: An assessment of online and offline blended teaching of Stomatology for non-stomatology medical students
Source: Research Square preprint supplement (doi:10.21203/rs.3.rs-6140068/v1), 2025-05-06
Supplement: Supplementary file 1 [file e994684ffd7a34bcf5b3bc0a.docx]

**Questionnaire on students’ perception for blended teaching mode**

This questionnaire is aimed to investigate the perception for teaching modes. The questionnaire is anonymous and students voluntarily participate in this survey. The final report does not involve personal information, and the results are only used for this study without other purposes.

1 You prefer which teaching mode?

A. Traditional teaching mode

B. Online teaching mode

C. Online and offline blended teaching mode

2 What problems do you think exist in the traditional teaching mode?

A. no playback, it is easy to miss knowledge

B. The spatiotemporal constraint

C. Low efficiency and poor effect

D. Content is closed and resources are scarce

E. Low class participation

F. It is not conducive to improving the ability of independent learning

3 What do you think are the advantages of online and offline blended teaching model?

A. It can arouse the enthusiasm of learning

B. It can strengthen the mastery of knowledge points

C. It can improve the ability of independent learning

D. Break through the limitation of traditional classroom and do not delay the learning progress

4 What do you think about the challenges of Online and Offline blended teaching model?

A. The difficulty of the course increased, and the learning pressure increased

B. Challenge of self-restraint

C. Unable to reasonably arrange online learning time

5 What do you think about establishing a wechat group?

| Items | strongly agree | agree | neutral | disagree | strongly disagree |
| --- | --- | --- | --- | --- | --- |
| Is conducive to timely communication between teachers and students | ○ | ○ | ○ | ○ | ○ |
| Too much information causing interference | ○ | ○ | ○ | ○ | ○ |
| Very necessary | ○ | ○ | ○ | ○ | ○ |

6 What do you think about getting class powerpoints after class?

| Items | strongly agree | agree | neutral | disagree | strongly disagree |
| --- | --- | --- | --- | --- | --- |
| Helps ease the study burden | ○ | ○ | ○ | ○ | ○ |
| Very necessary | ○ | ○ | ○ | ○ | ○ |

**Teaching effect questionnaire**

This questionnaire is aimed to investigate the teaching effect of different teaching methods. The questionnaire is anonymous and students voluntarily participate in this survey. The final report does not involve personal information, and the results are only used for this study without other purposes.

Question 1-10 are scale questions.

| strongly agree | agree | neutral | disagree | strongly disagree |
| --- | --- | --- | --- | --- |
| 1 point | 2 points | 3 points | 4 points | 5 points |
| **Teaching content**   1. The content is clearly organized, logically rigorous, easy to understand.  | ○ | ○ | ○ | ○ | ○ | | --- | --- | --- | --- | --- |   2. The teaching contains the difficult points clearly, highlights the key points, and  reflects the new progress of the discipline.   | ○ | ○ | ○ | ○ | ○ | | --- | --- | --- | --- | --- |   3. Correct use of foreign language vocabulary, foreign language pronunciation is accurate and clear.   | ○ | ○ | ○ | ○ | ○ | | --- | --- | --- | --- | --- |   4. The language is standardized, vivid and smooth, and the expression ability is strong, which can attract the attention of students.   | ○ | ○ | ○ | ○ | ○ | | --- | --- | --- | --- | --- |   5. Containing basic theory and knowledge   | ○ | ○ | ○ | ○ | ○ | | --- | --- | --- | --- | --- |   **Teaching method**  6. Teaching method is proper, pay attention to ability training and enlightening teaching.   | ○ | ○ | ○ | ○ | ○ | | --- | --- | --- | --- | --- |   7. The teaching time is arranged reasonably and the rhythm is proper.   | ○ | ○ | ○ | ○ | ○ | | --- | --- | --- | --- | --- |   8. Courseware production standard, handwriting clear, reasonable arrangement.   | ○ | ○ | ○ | ○ | ○ | | --- | --- | --- | --- | --- |   **Teaching effect**  9. Teachers Pay attention to communication with students, arouse students' enthusiasm, active classroom atmosphere.   | ○ | ○ | ○ | ○ | ○ | | --- | --- | --- | --- | --- |   10. Effective use of various teaching media.   | ○ | ○ | ○ | ○ | ○ | | --- | --- | --- | --- | --- | | | | | |
|  |  |  |  |  |
